# Supplementary material
Source: publisher site journal article supplement (https://www.dovepress.com/article/134777)
Supplement: Supplementary file 1 [file get_supplementary_file.php]

## Supplementary Table

| Diagnosis or Procedure                       | Definition                                                                                                                                                                                                                                                                                                                                                                                                                           |
|----------------------------------------------|--------------------------------------------------------------------------------------------------------------------------------------------------------------------------------------------------------------------------------------------------------------------------------------------------------------------------------------------------------------------------------------------------------------------------------------|
| Ablation - Atrial Flutter                    | Any of the following OPCS4 codes appear in any procedure field:-<br>K622 Percutaneous transluminal ablation of atrial wall for atrial flutter<br>K623 Percutaneous transluminal ablation of conducting system of heart for atrial flutter NEC<br>(April 2007 onwards)                                                                                                                                                                |
| Ablation - Atrioventricular (AV) Node        | Any of the following OPCS4 codes appear in any procedure field:-<br>K521 Open ablation of atrioventricular node<br>K571 Percutaneous transluminal ablation of atrioventricular node                                                                                                                                                                                                                                                  |
| Ablation - Other Foci                        | Any of the following OPCS4 codes appear in any procedure field:-<br>K574 Percutaneous transluminal ablation of accessory pathway (April 2006 onwards)<br>K575 Percutaneous transluminal ablation of atrial wall NEC (April 2006 onwards)<br>K578 Other specified other therapeutic transluminal operations on heart                                                                                                                  |
| Ablation - Pulmonary Vein                    | Any of the following OPCS4 codes appear in any procedure field:-<br>K621 Percutaneous transluminal ablation of pulmonary vein to left atrium conducting system (April 2007 onwards)                                                                                                                                                                                                                                                  |
| Atrial Fibrillation or Flutter               | Any of the following ICD10 codes appear in any diagnosis field:-<br>I48X Atrial fibrillation or flutter                                                                                                                                                                                                                                                                                                                              |
| Cardiomyopathy                               | Any of the following ICD10 codes appear in any diagnosis field:-<br>I42- Cardiomyopathy<br>I43- Cardiomyopathy in diseases classified elsewhere<br>I255 Ischemic cardiomyopathy                                                                                                                                                                                                                                                      |
| Cardiomyopathy - Hypertrophic                | Any of the following ICD10 codes appear in any diagnosis field:-<br>I421 Obstructive hypertrophic cardiomyopathy<br>I422 Other hypertrophic cardiomyopathy                                                                                                                                                                                                                                                                           |
| Cardioversion                                | Any of the following OPCS4 codes appear in any procedure field:-<br>X501 Direct current cardioversion<br>X502 External cardioversion NEC                                                                                                                                                                                                                                                                                             |
| Chronic Kidney Disease                       | Any of the following ICD10 codes appear in any diagnosis field:-<br>I12- Hypertensive renal disease<br>I13- Hypertensive heart and renal disease<br>N18- Chronic kidney disease                                                                                                                                                                                                                                                      |
| Chronic Obstructive Pulmonary Disease (COPD) | Any of the following ICD10 codes appear in any diagnosis field:-<br>J439 Emphysema, unspecified<br>J44- Other chronic obstructive pulmonary disease                                                                                                                                                                                                                                                                                  |
| Coronary Artery Bypass Graft (CABG)          | Any of the following OPCS4 codes appear in any procedure field:-<br>K40- Saphenous vein graft replacement of coronary artery<br>K41- Other autograft replacement of coronary artery<br>K42- Allograft replacement of coronary artery<br>K43- Prosthetic replacement of coronary artery<br>K44- Other replacement of coronary artery<br>K45- Connection of thoracic artery to coronary artery<br>K46- Other bypass of coronary artery |
| Coronary Artery Disease (CAD)                | Any of the following ICD10 codes appear in any diagnosis field:-<br>I20- Angina pectoris<br>I21- Acute myocardial infarction<br>I22- Subsequent myocardial infarction<br>I23- Certain current complications following acute myocardial infarction<br>I24- Other acute ischaemic heart diseases<br>I25- Chronic ischaemic heart disease<br>Z951 Presence of aortocoronary bypass graft                                                |

|                                                 |                                                                                                                                                                                                                                                                                                                                                                                                                                                                                                                                                                                                      |
|-------------------------------------------------|------------------------------------------------------------------------------------------------------------------------------------------------------------------------------------------------------------------------------------------------------------------------------------------------------------------------------------------------------------------------------------------------------------------------------------------------------------------------------------------------------------------------------------------------------------------------------------------------------|
| Diabetes                                        | Any of the following ICD10 codes appear in any diagnosis field:-<br>E10- Insulin-dependent diabetes mellitus<br>E11- Non-insulin-dependent diabetes mellitus<br>E12- Malnutrition-related diabetes mellitus<br>E13- Other specified diabetes mellitus<br>E14- Unspecified diabetes mellitus                                                                                                                                                                                                                                                                                                          |
| Heart Failure                                   | Any of the following ICD10 codes appear in any diagnosis field:-<br>I110 Hypertensive heart disease with (congestive) heart failure<br>I130 Hypertensive heart and renal disease with (congestive) heart failure<br>I132 Hypertensive heart and renal disease with both (congestive) heart failure and renal failure<br>I50- Heart failure                                                                                                                                                                                                                                                           |
| Hyperlipidaemia                                 | Any of the following ICD10 codes appear in any diagnosis field:-<br>E780 Pure hypercholesterolaemia<br>E781 Pure hyperglyceridaemia<br>E782 Mixed hyperlipidaemia<br>E783 Hyperchylomicronaemia<br>E784 Other hyperlipidaemia<br>E785 Hyperlipidaemia, unspecified                                                                                                                                                                                                                                                                                                                                   |
| Hypertension                                    | Any of the following ICD10 codes appear in any diagnosis field:-<br>I10- Essential (primary) hypertension<br>I11- Hypertensive heart disease<br>I12- Hypertensive renal disease<br>I13- Hypertensive heart and renal disease<br>I15- Secondary hypertension                                                                                                                                                                                                                                                                                                                                          |
| Obesity                                         | Any of the following ICD10 codes appear in any diagnosis field:-<br>E66- Obesity                                                                                                                                                                                                                                                                                                                                                                                                                                                                                                                     |
| Other Arrhythmias/Conduction Disorders          | Any of the following ICD10 codes appear in any diagnosis field:-<br>I44- Atrioventricular and left bundle-branch block<br>I45- Other conduction disorders<br>I47- Paroxysmal tachycardia<br>I49- Other cardiac arrhythmias                                                                                                                                                                                                                                                                                                                                                                           |
| Other Operations on the Heart Conduction System | Any of the following OPCS4 codes appear in any procedure field:-<br>K522 Epicardial excision of rhythmogenic focus<br>K523 Endocardial excision of rhythmogenic focus<br>K524 Open division of accessory pathway within heart<br>K525 Open division of conducting system of heart NEC<br>K528 Other specified open operations on conducting system of heart<br>K529 Unspecified open operations on conducting system of heart<br>K572 Percutaneous transluminal ablation of conducting system of heart NEC<br>K573 Percutaneous transluminal removal of foreign body from heart (April 2006 onwards) |

|                                                           |                                                                                                                                                                                                                                                                                                                                                                                                                                                                                                                                                                                                                                                                                                                                                                                                                                                                                                                                                                                                                                                                                                                                                                                                                                                                                                                                                                                                                                                                                                                                                                                                                                                                                                                                                                                                                                                                                                                                                                                                                                                                                                                                         |
|-----------------------------------------------------------|-----------------------------------------------------------------------------------------------------------------------------------------------------------------------------------------------------------------------------------------------------------------------------------------------------------------------------------------------------------------------------------------------------------------------------------------------------------------------------------------------------------------------------------------------------------------------------------------------------------------------------------------------------------------------------------------------------------------------------------------------------------------------------------------------------------------------------------------------------------------------------------------------------------------------------------------------------------------------------------------------------------------------------------------------------------------------------------------------------------------------------------------------------------------------------------------------------------------------------------------------------------------------------------------------------------------------------------------------------------------------------------------------------------------------------------------------------------------------------------------------------------------------------------------------------------------------------------------------------------------------------------------------------------------------------------------------------------------------------------------------------------------------------------------------------------------------------------------------------------------------------------------------------------------------------------------------------------------------------------------------------------------------------------------------------------------------------------------------------------------------------------------|
| Pacemaker or Implantable Cardioverter Defibrillator (ICD) | <p>Any of the following OPCS4 codes appear in any procedure field:-<br/> K591 Implantation of cardioverter defibrillator using one electrode lead<br/> K592 Implantation of cardioverter defibrillator using two electrode leads<br/> K593 Resiting of lead of cardioverter defibrillator<br/> K594 Renewal of cardioverter defibrillator<br/> K595 Removal of cardioverter defibrillator<br/> K596 Implantation of cardioverter defibrillator using three electrode leads<br/> K598 Other specified cardioverter defibrillator introduced through the vein<br/> K599 Unspecified cardioverter defibrillator introduced through the vein<br/> K601 Implantation of intravenous cardiac pacemaker system NEC<br/> K602 Resiting of lead of intravenous cardiac pacemaker system<br/> K603 Renewal of intravenous cardiac pacemaker system<br/> K604 Removal of intravenous cardiac pacemaker system<br/> K605 Implantation of intravenous single chamber cardiac pacemaker system<br/> K606 Implantation of intravenous dual chamber cardiac pacemaker system<br/> K607 Implantation of intravenous biventricular cardiac pacemaker system<br/> K608 Other specified cardiac pacemaker system introduced through vein<br/> K609 Unspecified cardiac pacemaker system introduced through vein<br/> K611 Implantation of cardiac pacemaker system NEC<br/> K612 Resiting of lead of cardiac pacemaker system NEC<br/> K613 Renewal of cardiac pacemaker system NEC<br/> K614 Removal of cardiac pacemaker system NEC<br/> K615 Implantation of single chamber cardiac pacemaker system<br/> K616 Implantation of dual chamber cardiac pacemaker system<br/> K617 Implantation of biventricular cardiac pacemaker system<br/> K618 Other specified other cardiac pacemaker system<br/> K619 Unspecified other cardiac pacemaker system<br/> U311 Distant pacemaker test<br/> U318 Other specified pacemaker testing<br/> U319 Unspecified pacemaker testing</p> <p>OR any of the following ICD10 codes appear in any diagnosis field:-<br/> Z450 Adjustment and management of cardiac pacemaker<br/> Z950 Presence of cardiac pacemaker</p> |
| Percutaneous Coronary Intervention (PCI)                  | <p>Any of the following OPCS4 codes appear in any procedure field:-<br/> K49- Transluminal balloon angioplasty of coronary artery<br/> K50- Other therapeutic transluminal operations on coronary artery<br/> K75- Percutaneous transluminal balloon angioplasty and insertion of stent into coronary artery (only available from April 2006)</p>                                                                                                                                                                                                                                                                                                                                                                                                                                                                                                                                                                                                                                                                                                                                                                                                                                                                                                                                                                                                                                                                                                                                                                                                                                                                                                                                                                                                                                                                                                                                                                                                                                                                                                                                                                                       |
| Peripheral Vascular Disease (PVD)                         | <p>Any of the following ICD10 codes appear in any diagnosis field:-<br/> I70- Atherosclerosis<br/> I71- Aortic aneurysm and dissection<br/> I72- Other aneurysm and dissection<br/> I73- Other peripheral vascular diseases<br/> I74- Arterial embolism and thrombosis<br/> I798 Other disorders of arteries, arterioles and capillaries in diseases classified elsewhere</p>                                                                                                                                                                                                                                                                                                                                                                                                                                                                                                                                                                                                                                                                                                                                                                                                                                                                                                                                                                                                                                                                                                                                                                                                                                                                                                                                                                                                                                                                                                                                                                                                                                                                                                                                                           |
| Pulmonary Disease                                         | <p>Any of the following ICD10 codes appear in any diagnosis field:-<br/> I26- Pulmonary embolism<br/> I27- Other pulmonary heart diseases<br/> I28- Other diseases of pulmonary vessels</p>                                                                                                                                                                                                                                                                                                                                                                                                                                                                                                                                                                                                                                                                                                                                                                                                                                                                                                                                                                                                                                                                                                                                                                                                                                                                                                                                                                                                                                                                                                                                                                                                                                                                                                                                                                                                                                                                                                                                             |
| Sleep Apnoea                                              | <p>Any of the following ICD10 codes appear in any diagnosis field:-<br/> G473 Sleep apnoea</p>                                                                                                                                                                                                                                                                                                                                                                                                                                                                                                                                                                                                                                                                                                                                                                                                                                                                                                                                                                                                                                                                                                                                                                                                                                                                                                                                                                                                                                                                                                                                                                                                                                                                                                                                                                                                                                                                                                                                                                                                                                          |
| Stroke - Hemorrhagic                                      | <p>Any of the following ICD10 codes appear in any diagnosis field:-<br/> I60- Subarachnoid haemorrhage<br/> I61- Intracerebral haemorrhage<br/> I62- Other nontraumatic intracranial haemorrhage</p>                                                                                                                                                                                                                                                                                                                                                                                                                                                                                                                                                                                                                                                                                                                                                                                                                                                                                                                                                                                                                                                                                                                                                                                                                                                                                                                                                                                                                                                                                                                                                                                                                                                                                                                                                                                                                                                                                                                                    |

|                                 |                                                                                                                                                                                                                                                                                                                                                                                                                                                                                                                                                                                                                                                                                                                                                                                                                                                         |
|---------------------------------|---------------------------------------------------------------------------------------------------------------------------------------------------------------------------------------------------------------------------------------------------------------------------------------------------------------------------------------------------------------------------------------------------------------------------------------------------------------------------------------------------------------------------------------------------------------------------------------------------------------------------------------------------------------------------------------------------------------------------------------------------------------------------------------------------------------------------------------------------------|
| Stroke - Ischemic               | Any of the following ICD10 codes appear in any diagnosis field:-<br>I63- Cerebral infarction<br>I64X Stroke, not specified as haemorrhage or infarction                                                                                                                                                                                                                                                                                                                                                                                                                                                                                                                                                                                                                                                                                                 |
| Transient Ischemic Attack (TIA) | Any of the following ICD10 codes appear in any diagnosis field:-<br>G45- Transient cerebral ischaemic attacks and related syndromes                                                                                                                                                                                                                                                                                                                                                                                                                                                                                                                                                                                                                                                                                                                     |
| Valvular Disease                | Any of the following OPCS4 codes appear in any procedure field:-<br>K253 Prosthetic replacement of mitral valve<br>K263 Prosthetic replacement of aortic valve<br><br>OR any of the following ICD10 codes appear in any diagnosis field:-<br>I05- Rheumatic mitral valve diseases<br>I06- Rheumatic aortic valve diseases<br>I07- Rheumatic tricuspid valve diseases<br>I08- Multiple valve diseases<br>I091 Rheumatic diseases of endocardium, valve unspecified<br>I34- Nonrheumatic mitral valve disorders<br>I35- Nonrheumatic aortic valve disorders<br>I36- Nonrheumatic tricuspid valve disorders<br>I37- Pulmonary valve disorders<br>I38- Endocarditis, valve unspecified<br>I39- Endocarditis and heart valve disorders in diseases classified elsewhere<br>Z952 Presence of prosthetic heart valve<br>Z953 Presence of xenogenic heart valve |
| Vascular Disease                | Any of the components in these fields:-<br>Coronary Artery Disease<br>Peripheral Vascular Disease<br>CABG<br>PCI                                                                                                                                                                                                                                                                                                                                                                                                                                                                                                                                                                                                                                                                                                                                        |

**Figure S1 A: CHADS<sub>2</sub> Risk Scores by Matched Cohort**

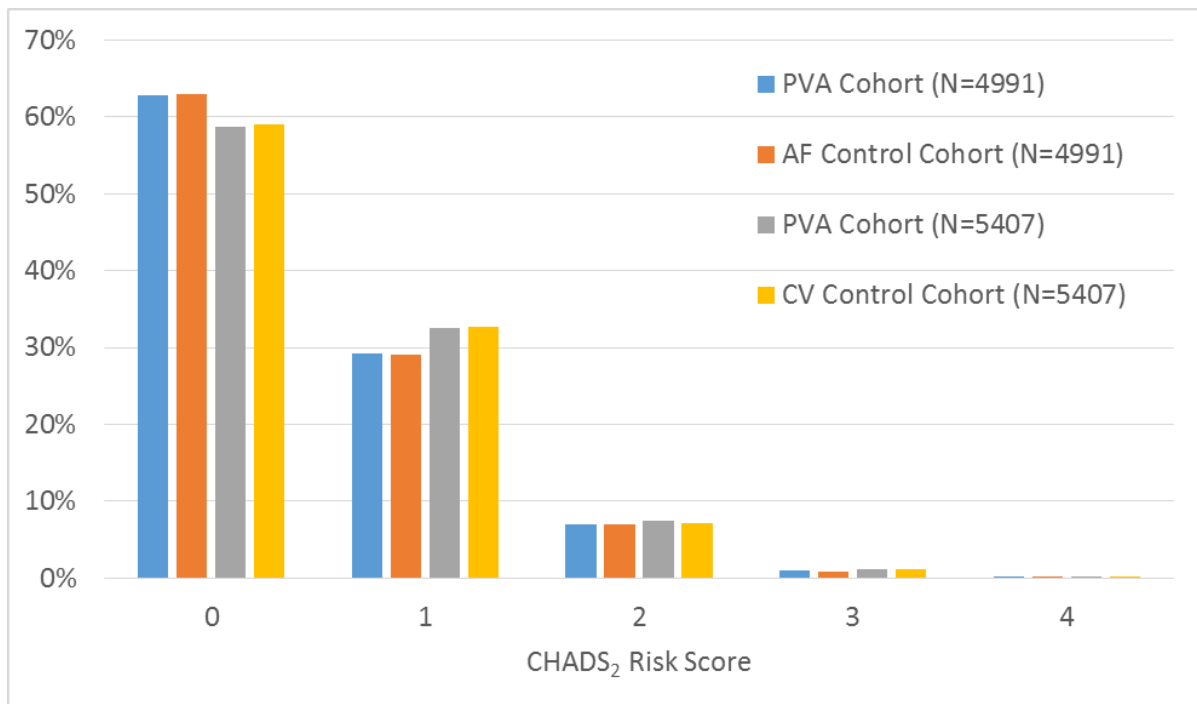

PVA: pulmonary vein ablation; AF: atrial fibrillation; CV: cardioversion

**Figure S1 B: CHA<sub>2</sub>DS<sub>2</sub>-VASc Risk Scores by Matched Cohort**

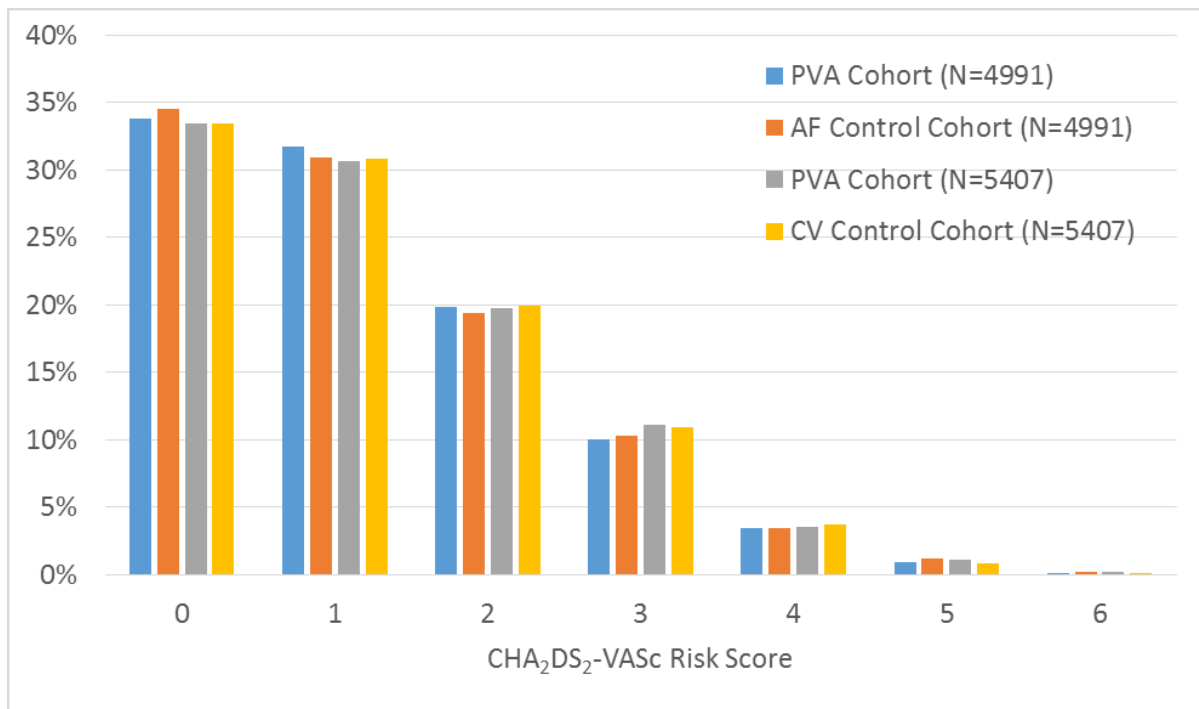

PVA: pulmonary vein ablation; AF: atrial fibrillation; CV: cardioversion

**Figure S2 A: Patient Follow-up by Matched Cohort (PVA vs. General AF)**

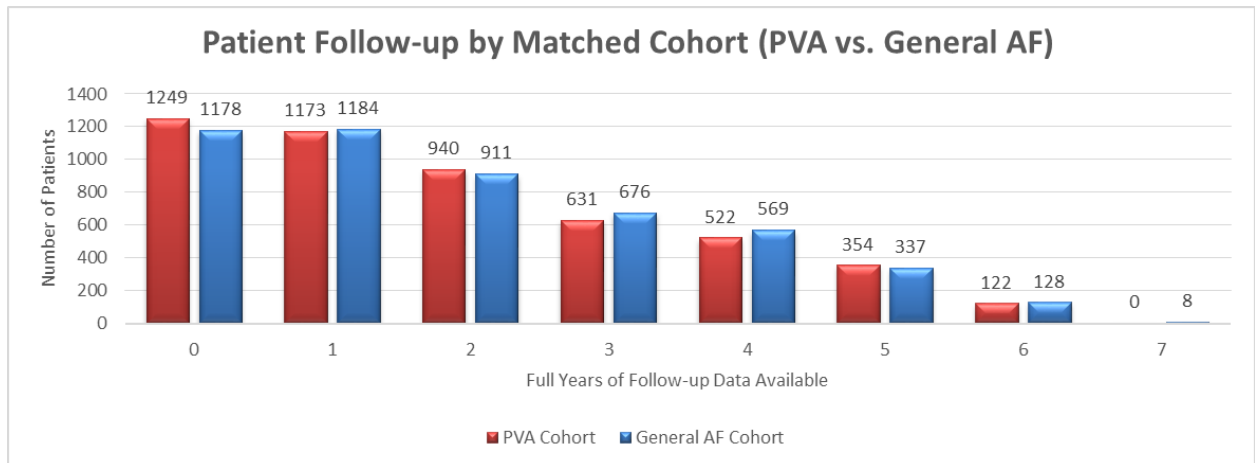

PVA: pulmonary vein ablation; AF: atrial fibrillation

**Figure S2 B: Patient Follow-up by Matched Cohort (PVA vs. Cardioversion)**

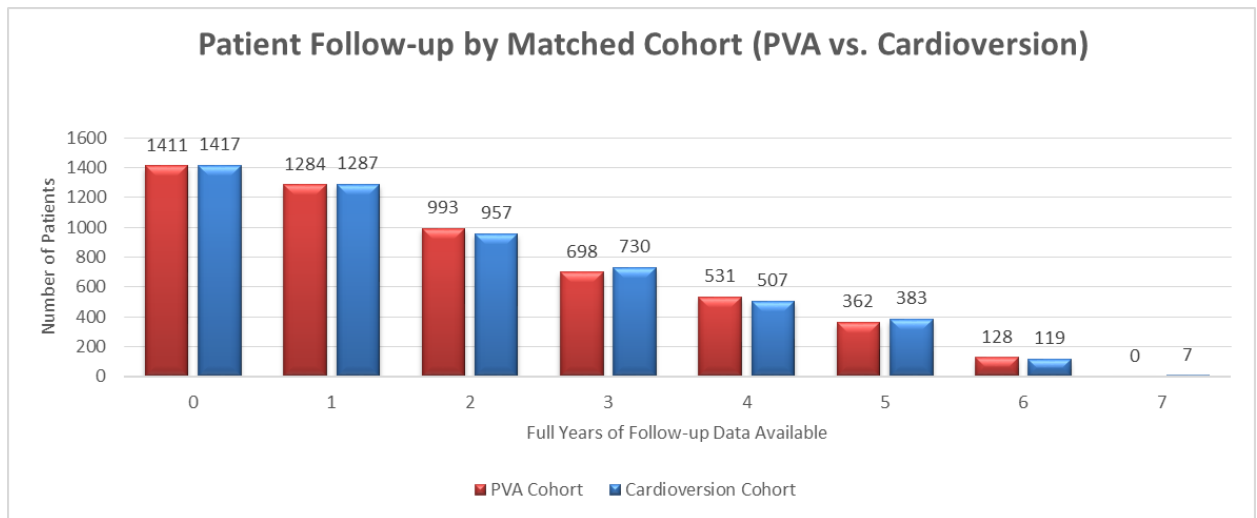

PVA: pulmonary vein ablation
